# Supplementary material for: The prescription pattern and awareness about antibiotic prophylaxis and resistance among a group of Egyptian pediatric and general dentists: a cross sectional study
Source: Springer Nature journal article supplement (doi:10.1186/s12903-021-01685-y), 2021-06-26
Supplement: MOESM1 [file 19295750]

## Questionnaire

**Specialty:** a. Pediatric dentist b. General dentist

**Graduation university:** a. Public b. Private

**Work experience in years:**

- a. Less than 2 years
- b. From 2 to 5 years
- c. More than 5 years

**Working place:**

- a. Clinical practice
- b. Academics
- c. Both

**Do you routinely prescribe antibiotics in the following situations?**

- Pulpitis: a. Yes b. No
- Draining sinus tract: a. Yes b. No
- Localized intraoral swelling: a. Yes b. No
- Acute facial swelling: a. Yes b. No
- Dental trauma: a. Yes b. No
- Pediatric periodontal diseases: a. Yes b. No
- Pericoronitis: a. Yes b. No
- Simple extraction: a. Yes b. No
- Extraction by the open method: a. Yes b. No
- Periapical abscess: a. Yes b. No
- Apical periodontitis: a. Yes b. No
- Dry socket: a. Yes b. No
- Evidence of anaerobic infection: a. Yes b. No

**Which is the most commonly prescribed antibiotic by you?**

- a. Amoxicillin
- b. Amoxicillin with clavulanic acid
- c. Ampicillin with Sulbactam
- d. Cephalosporins
- e. Clindamycin
- f. Amoxicillin with flucloxacillin

**What is the duration of the antibiotic course?**

- a. Less than 5 days
- b. 5 to 7 days
- c. More than 7 days

**Do you prescribe antibiotics for the following systemic conditions:**

- |                             |        |       |
|-----------------------------|--------|-------|
| a. Cardiovascular diseases: | a. Yes | b. No |
| b. Viral infections:        | a. Yes | b. No |
| c. Juvenile diabetes:       | a. Yes | b. No |
| d. Blood dyscrasias:        | a. Yes | b. No |
| e. Respiratory disorders:   | a. Yes | b. No |

**Are you aware of the current AAPD guidelines for "antibiotic prescription"?**

- a. Yes
- b. No

**Do you follow the same?**

- a. Yes
- b. No

**Are you aware of the current AAPD guidelines for "antibiotic prophylaxis"?**

- a. Yes
- b. No

**Do you follow the same?**

- a. Yes
- b. No

**Are you aware of the term "antibiotic resistance"?**

a. Yes

b. No

**Self-medication with antibiotics by patients to get relief from dental pain may be responsible for antibiotic misuse.**

a. Yes

b. No

**Do you prescribe antibiotics when the parents insist that the treatment should be completed soon?**

a. Yes

b. No

**Do you inquire from your patient about whether he/she has taken a course of antibiotics in the past 1 week before prescribing antibiotics?**

a. Yes

b. No

**Do you advise your patient to adhere to the dosage regimen and inform the consequences of not doing so?**

a. Yes

b. No

**Do you prescribe antibiotics if you have many appointments already waiting at your clinic?**

a. Yes

b. No

**Do you prescribe antibiotics to sustain the patient until the specialist treats the patient?**

a. Yes

b. No
